# Supplementary material for: Data-mining analysis of factors affecting the global distribution of soil carbon in observational databases and Earth system models
Source: Copernicus journal article supplement (doi:10.5194/gmd-2016-138), 2016-06-30
Supplement: Supplementary file 1 [file gmd-2016-138-supplement.pdf]

*Supplement to*

**Data-mining analysis of factors affecting the global distribution of soil carbon in observational databases and Earth system models**

S. Hashimoto et al.

Correspondence: S. Hashimoto ([shojih@ffpri.affrc.go.jp](mailto:shojih@ffpri.affrc.go.jp))

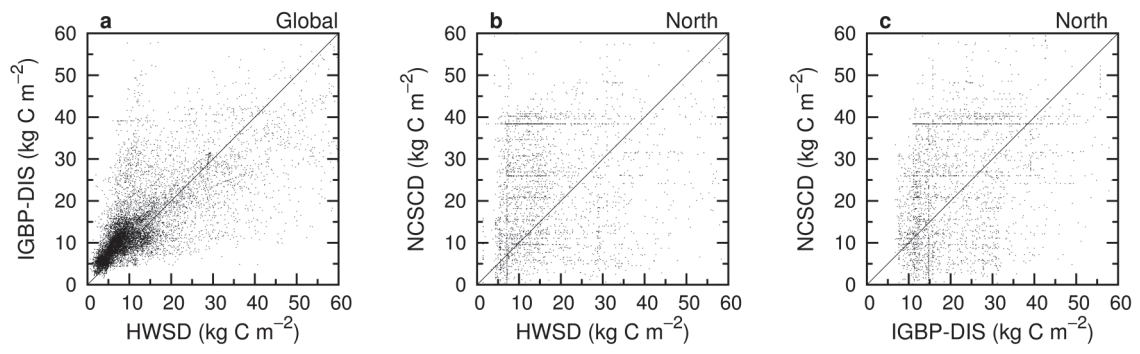

Figure S1: Grid-scale comparison (1°) of SOC databases (a: global; b and c: north).

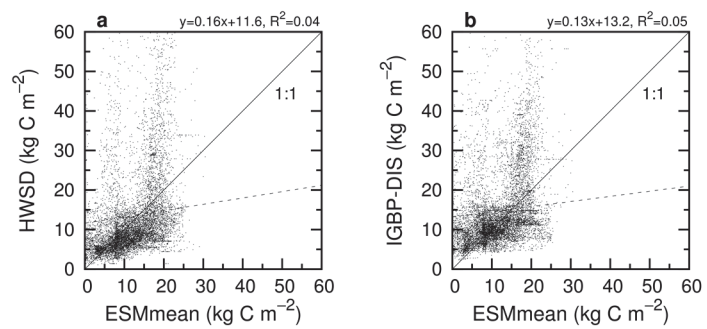

Figure S2: Relationship between ESM ensemble and observational databases at the grid scale (global, 1°).

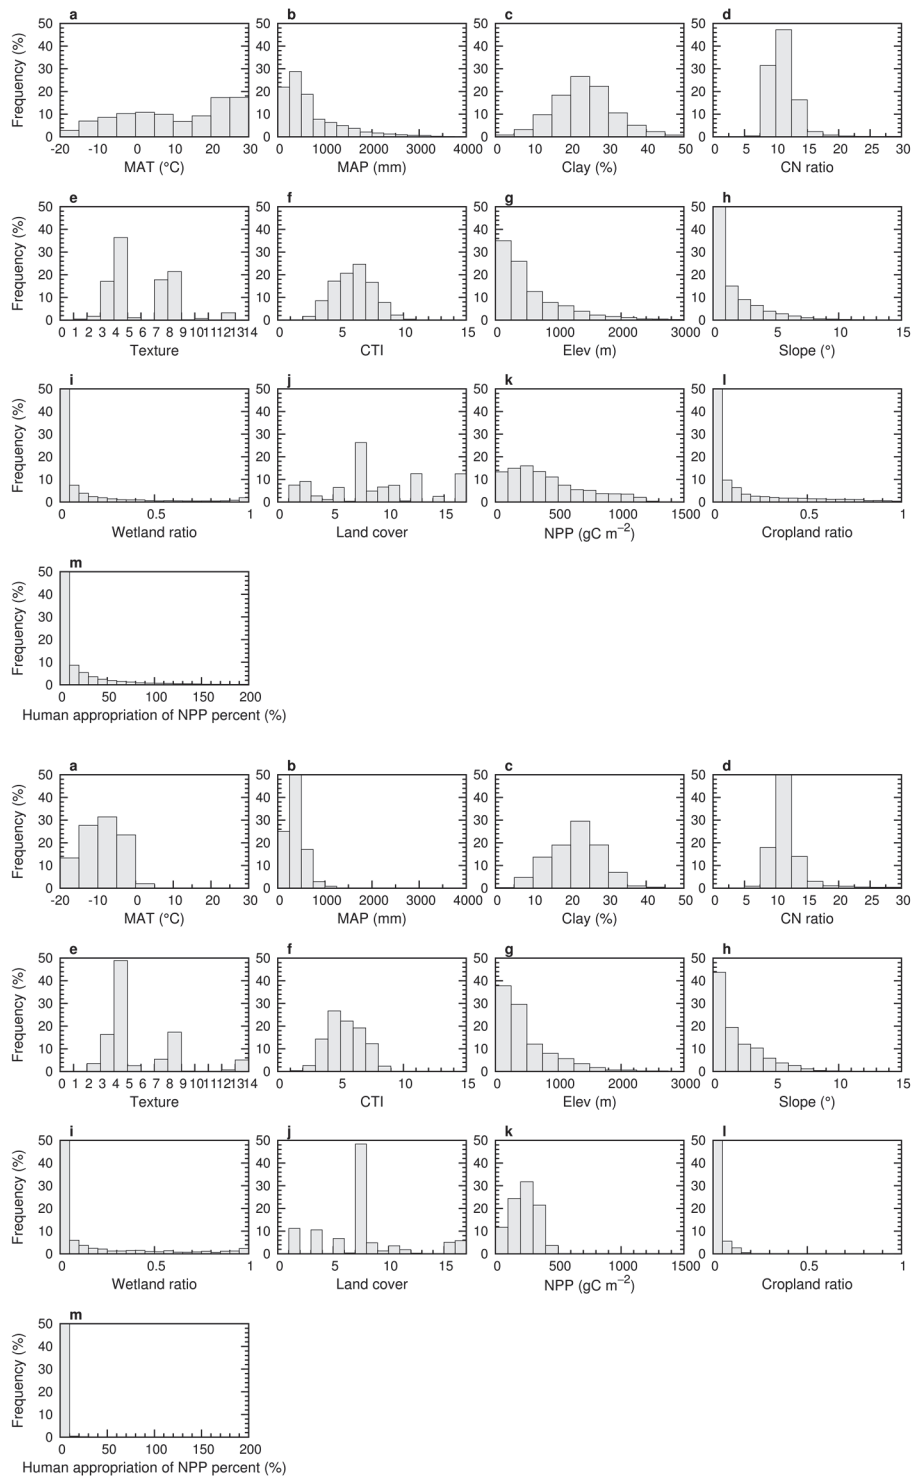

Figure S3: Histogram of variables for global (top) and northern (bottom) databases.

Table S1: BRT model performance for observational databases.

|        | Database | Slope | Y-intercept | <i>P</i> | <i>R</i> <sup>2</sup> | RMSE | <i>N</i> |
|--------|----------|-------|-------------|----------|-----------------------|------|----------|
| Global | HWSD     | 1.03  | −0.38       | <0.001   | 0.96                  | 2.35 | 13854    |
|        | IGBP-DIS | 1.02  | −0.27       | <0.001   | 0.98                  | 1.47 | 13854    |
| North  | HWSD     | 1.02  | −0.39       | <0.001   | 0.98                  | 2.08 | 3176     |
|        | IGBP-DIS | 1.01  | −0.24       | <0.001   | 0.99                  | 0.96 | 3176     |
|        | NCSCD    | 1.18  | −4.46       | <0.001   | 0.65                  | 9.38 | 3176     |

Table S2: Performance of BRTs for ESM output.

|        | ESM     | Slope | Y-intercept | <i>P</i> | <i>R</i> <sup>2</sup> | RMSE  | <i>N</i> |
|--------|---------|-------|-------------|----------|-----------------------|-------|----------|
| Global | BCC     | 1.02  | -0.16       | <0.001   | 0.97                  | 0.82  | 13805    |
|        | BNU     | 1.03  | -0.14       | <0.001   | 0.97                  | 0.72  | 13175    |
|        | CanESM2 | 1.03  | -0.37       | <0.001   | 0.96                  | 2.00  | 13813    |
|        | CCSM4   | 1.03  | -0.12       | <0.001   | 0.96                  | 0.64  | 13112    |
|        | CESM1   | 1.03  | -0.10       | <0.001   | 0.96                  | 0.58  | 13147    |
|        | CMCC    | 1.01  | -0.27       | <0.001   | 0.99                  | 3.13  | 10382    |
|        | GFDL    | 1.01  | -0.11       | <0.001   | 0.99                  | 1.66  | 13854    |
|        | GISS    | 1.02  | -0.42       | <0.001   | 0.97                  | 3.74  | 13164    |
|        | HadGEM2 | 1.03  | -0.26       | <0.001   | 0.96                  | 1.25  | 13357    |
|        | INMCM4  | 1.04  | -0.47       | <0.001   | 0.96                  | 1.81  | 12161    |
|        | IPSL    | 1.01  | -0.11       | <0.001   | 0.98                  | 0.90  | 13728    |
|        | MIROC   | 1.01  | -0.28       | <0.001   | 0.98                  | 1.88  | 10698    |
|        | MPI     | 1.03  | -0.64       | <0.001   | 0.97                  | 2.39  | 11861    |
|        | MRI     | 1.03  | -0.38       | <0.001   | 0.96                  | 1.77  | 12780    |
|        | NorESM  | 1.03  | -0.12       | <0.001   | 0.96                  | 0.64  | 13530    |
| North  | BCC     | 1.02  | -0.18       | <0.001   | 0.99                  | 0.50  | 3170     |
|        | BNU     | 1.02  | -0.10       | <0.001   | 0.99                  | 0.37  | 3134     |
|        | CanESM2 | 1.02  | -0.33       | <0.001   | 0.99                  | 1.37  | 3174     |
|        | CCSM4   | 1.02  | -0.06       | <0.001   | 0.98                  | 0.35  | 3145     |
|        | CESM1   | 1.02  | -0.04       | <0.001   | 0.99                  | 0.33  | 3130     |
|        | CMCC    | 1.09  | -4.75       | <0.001   | 0.84                  | 14.52 | 2600     |
|        | GFDL    | 1.02  | -0.69       | <0.001   | 0.99                  | 1.30  | 3176     |
|        | GISS    | 1.02  | -0.61       | <0.001   | 0.99                  | 2.04  | 3108     |
|        | HadGEM2 | 1.01  | -0.09       | <0.001   | 0.99                  | 0.45  | 3091     |
|        | INMCM4  | 1.01  | -0.15       | <0.001   | 0.99                  | 0.63  | 2848     |
|        | IPSL    | 1.02  | -0.29       | <0.001   | 0.99                  | 0.41  | 3167     |
|        | MIROC   | 1.01  | -0.51       | <0.001   | 0.99                  | 0.92  | 2620     |
|        | MPI     | 1.01  | -0.16       | <0.001   | 0.99                  | 0.79  | 2834     |
|        | MRI     | 1.02  | -0.18       | <0.001   | 0.99                  | 0.64  | 3176     |
|        | NorESM  | 1.01  | -0.04       | <0.001   | 0.99                  | 0.26  | 3176     |
